# Supplementary material
Source: publisher figshare collection journal article supplement (https://karger.figshare.com/ndownloader/files/30702170)
Supplement: Supplementary file 1 [file 30702170]

Supplemental Table 1. Correlation between Δ PTH and different laboratoristics baseline values.

|  | *test* | *value* | *p-value* |
| --- | --- | --- | --- |
| Serum Creatinine | Simple regression | T ratio = 8.70 | 0,0010 |
| eGFR | Simple regression | T ratio = - 11.3 | 0.0003 |
| Calcium (mg/dl) | Simple regression | T ratio = - 5.4 | 0.0056 |
| Vitamin D 25 OH (ng/ml) | Simple regression | T ratio = - 5.72 | 0.0007 |
| β-CTx (ng/ml) | Simple regression | T ratio = 6.89 | 0.0002 |
| Osteocalcin (ng/ml) | Simple regression | T ratio = 4.27 | 0.0130 |
| BALP (ng/ml) | Simple regression | T ratio = 11.2 | < 0.001 |
